# Supplementary material
Source: publisher figshare collection journal article supplement (https://acs.figshare.com/ndownloader/files/14636567)
Supplement: Supplementary file 1 [file 14636567]

# Supporting Information

## Soft and Hard Interactions between Polystyrene Nanoplastics and Human Serum Albumin Protein Corona

*Shinji Kihara<sup>1, 2</sup>, Nadine J. van der Heijden<sup>1, 2</sup>, Chris K. Seal<sup>1, 2</sup>, Jitendra P. Mata<sup>3</sup>, Andrew E. Whitten<sup>3</sup>, Ingo Köper<sup>4</sup>, and Duncan J. McGillivray<sup>\*1, 2</sup>*

*<sup>1</sup> School of Chemical Sciences, The University of Auckland, Auckland 1010, New Zealand*

*<sup>2</sup> The MacDiarmid Institute for Advanced Materials and Nanotechnology, Wellington 6140, New Zealand*

*<sup>3</sup> Australian Centre for Neutron Scattering, Australian Nuclear Science and Technology Organisation, Lucas Heights, NSW 2234, Australia*

*<sup>4</sup> Institute for Nanoscale Science and Technology, College for Science and Engineering, Flinders University, Adelaide, SA 5042, Australia*

## Relevant properties

**Table S1.** Physical properties of HSA, PS<sub>s</sub><sup>-</sup>, and PS<sub>L</sub><sup>-</sup>.

| Name                         | Formula                                                                               | Molecular weight / g mol <sup>-1</sup> | Density / g cm <sup>-3</sup> | Isoelectric point | SLD <sub>n</sub> / 10 <sup>-6</sup> Å <sup>-2</sup> |
|------------------------------|---------------------------------------------------------------------------------------|----------------------------------------|------------------------------|-------------------|-----------------------------------------------------|
| HSA                          | C <sub>2916</sub> H <sub>4624</sub> N <sub>760</sub> O <sub>889</sub> S <sub>41</sub> | 66500                                  | 1.360                        | 5.5 <sup>a</sup>  | 1.84-3.14 <sup>b,1</sup>                            |
| PS <sub>s</sub> <sup>-</sup> | C <sub>8</sub> H <sub>8</sub> (monomer)                                               | 104                                    | 1.040                        | <2                | 1.30                                                |
| PS <sub>L</sub> <sup>-</sup> | C <sub>8</sub> H <sub>8</sub> (monomer)                                               | 104                                    | 1.040                        | <2                | 1.30                                                |
| H <sub>2</sub> O             | H <sub>2</sub> O                                                                      | 18                                     | 0.997                        | NA                | -0.56                                               |
| D <sub>2</sub> O             | D <sub>2</sub> O                                                                      | 20                                     | 1.100                        | NA                | 6.25                                                |

<sup>a</sup> based on a theoretical calculation (SI Figure S9)

<sup>b</sup> The lower limit of the SLD<sub>n</sub> occurs when there is no hydrogen-deuterium (H/D) exchange for exchangeable hydrogens, occurs while the upper limit assumes the 100% H/D exchange.

## Circular dichroism (CD) spectroscopy

**Table S2.** Secondary structure of HSA resolved by spectra deconvolution of CD spectra collected at pH 7.4.

| Sample                                                       | $\alpha$ -helix | $\beta$ -sheet | Random coil  |
|--------------------------------------------------------------|-----------------|----------------|--------------|
| Native HSA                                                   | 51% $\pm$ 2%    | 21% $\pm$ 2%   | 28% $\pm$ 1% |
| With PS <sub>s</sub> <sup>-</sup> (0.1 mg mL <sup>-1</sup> ) | 52% $\pm$ 2%    | 20% $\pm$ 3%   | 29% $\pm$ 2% |
| With PS <sub>L</sub> <sup>-</sup> (0.1 mg mL <sup>-1</sup> ) | 52% $\pm$ 1%    | 21% $\pm$ 2%   | 28% $\pm$ 2% |

**Table S3.** Secondary structure of HSA resolved by spectra deconvolution of CD spectra collected at pH 7.4.

| Sample                                                       | $\alpha$ -helix | $\beta$ -sheet | Random coil  |
|--------------------------------------------------------------|-----------------|----------------|--------------|
| Native HSA                                                   | 51% $\pm$ 2%    | 20% $\pm$ 1%   | 29% $\pm$ 2% |
| With PS <sub>s</sub> <sup>-</sup> (0.1 mg mL <sup>-1</sup> ) | 46% $\pm$ 2%    | 12% $\pm$ 2%   | 42% $\pm$ 3% |
| With PS <sub>L</sub> <sup>-</sup> (0.1 mg mL <sup>-1</sup> ) | 52% $\pm$ 1%    | 19% $\pm$ 3%   | 29% $\pm$ 2% |

### Zeta potential values

**Table S4.** Zeta potential values of PS particles, HSA, and PS/HSA complexes at pH 7.4 and 5.0.

| Sample                            | pH 7.4              | pH 5.0              |
|-----------------------------------|---------------------|---------------------|
| HSA                               | -12.2 $\pm$ 3.2 mV  | -4.4 $\pm$ 4.5 mV   |
| PS <sub>s</sub> <sup>-</sup>      | -50.2 $\pm$ 12.0 mV | -45.3 $\pm$ 6.8 mV  |
| PS <sub>L</sub> <sup>-</sup>      | -58.2 $\pm$ 7.0 mV  | -46.8 $\pm$ 11.6 mV |
| HSA/ PS <sub>s</sub> <sup>-</sup> | -15.5 $\pm$ 3.0 mV  | -15.8 $\pm$ 9.8 mV  |
| HSA/ PS <sub>L</sub> <sup>-</sup> | -43.4 $\pm$ 7.1 mV  | -9.0 $\pm$ 6.8 mV   |

## Small angle neutron scattering (SANS)

### Polystyrene nanoparticles

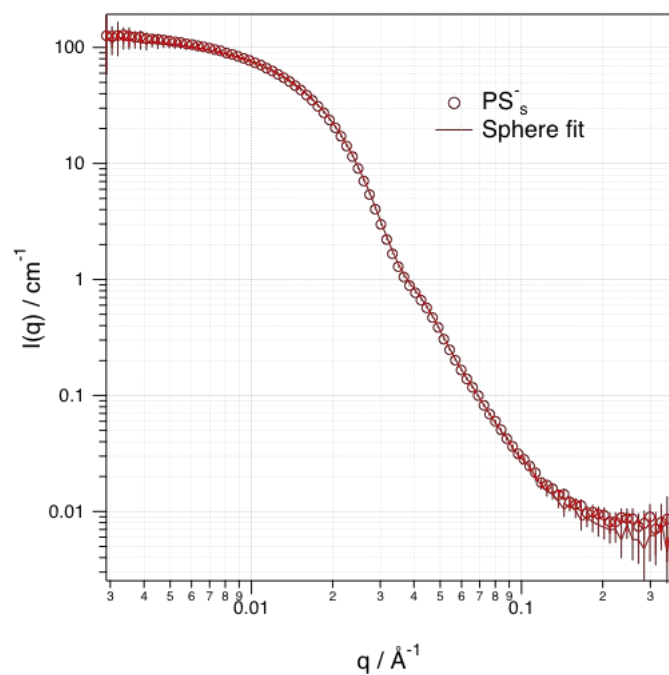

**Figure S1.** SANS curve of  $\text{PS}_s$  at  $9.0 \text{ mg mL}^{-1}$  in 100% d-buffer, fitted with sphere model

**Table S5.** Fitting parameters for SANS curve shown in Figure S1

| Scale                  | Background / $\text{cm}^{-1}$ | $\text{SLD}_n / 10^{-6} \text{\AA}^{-2}$ | $\text{SLD}_n \text{ solvent} / 10^{-6} \text{\AA}^{-2}$ | Radius / $\text{\AA}$ |
|------------------------|-------------------------------|------------------------------------------|----------------------------------------------------------|-----------------------|
| $0.00681 \pm 0.000150$ | $0.00683 \pm 0.000300$        | 1.34                                     | 6.35                                                     | $115 \pm 0.100$       |

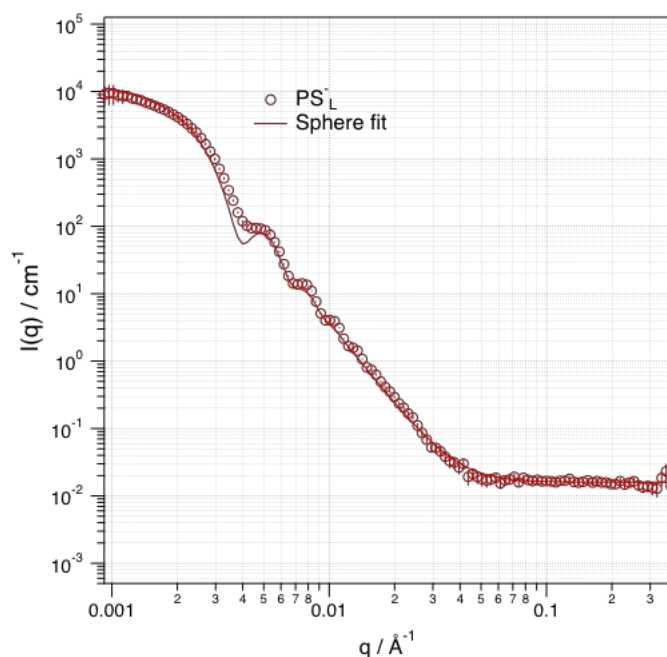

**Figure S2.** SANS curve for  $\text{PS}_L$  at  $9.0 \text{ mg mL}^{-1}$  in 100% d-buffer (pH 7.4), fitted with a spherical model.

**Table S6.** Fitting parameters for SANS curve shown in Figure S2.

| Scale                     | Background / $\text{cm}^{-1}$ | $\text{SLD}_n / 10^{-6} \text{ \AA}^{-2}$ | $\text{SLD}_n \text{ solvent} / 10^{-6} \text{ \AA}^{-2}$ | Radius / $\text{\AA}$ |
|---------------------------|-------------------------------|-------------------------------------------|-----------------------------------------------------------|-----------------------|
| $0.000820 \pm 0.00000650$ | $0.0160 \pm 0.000420$         | 1.34                                      | 6.35                                                      | $1187 \pm 1.8^a$      |

<sup>a</sup> The optimised polydispersity was 2%

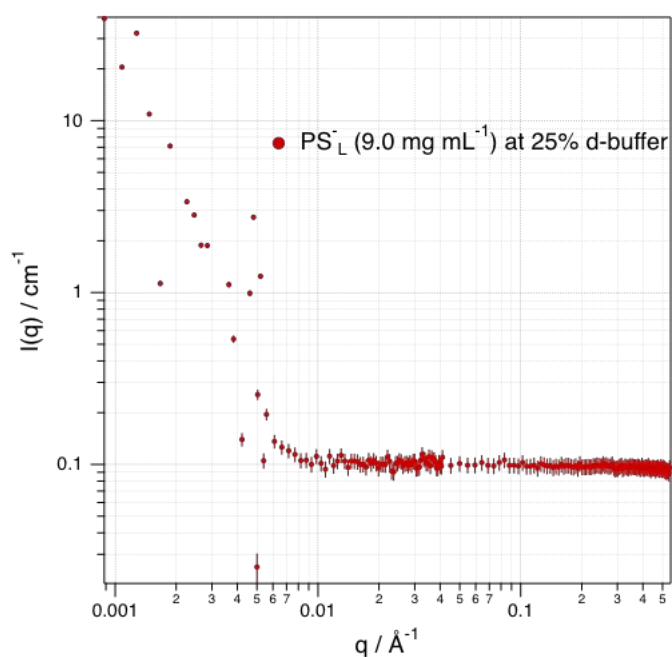

**Figure S3.** SANS curve of  $\text{PS}_L$  at  $9.0 \text{ mg mL}^{-1}$  in 25% d-buffer.

## Human serum albumin (HSA)

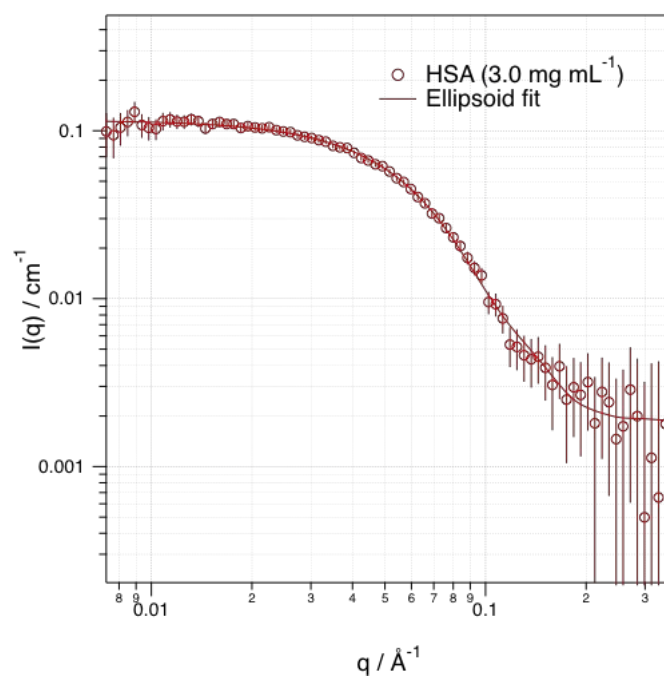

**Figure S4.** SANS curve for HSA at 3.0 mg mL<sup>-1</sup> in 100% d-buffer (pH 7.4), fitted with ellipsoidal model.

**Table S7.** Fitting parameters for SANS curve shown in Figure S4.

| SLD <sub>n</sub> / 10 <sup>-6</sup> Å <sup>-2</sup> | SLD <sub>n</sub> solvent / 10 <sup>-6</sup> Å <sup>-2</sup> | Radius polar / Å | Radius equatorial / Å |
|-----------------------------------------------------|-------------------------------------------------------------|------------------|-----------------------|
| 2.40                                                | 6.35                                                        | 15.6 ± 1.90      | 43.7 ± 0.700          |

## PS/HSA complex

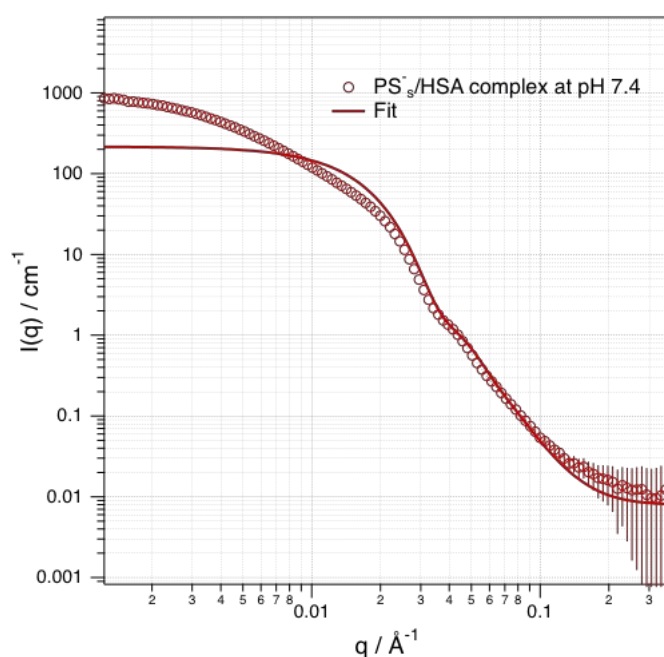

**Figure S5.** SANS curve for PS<sub>s</sub> (9.0 mg mL<sup>-1</sup>)/HSA (3.0 mg mL<sup>-1</sup>) complex in 100% d-buffer (pH 7.4). The scattering intensity was fitted with a combination of spherical and ellipsoidal models.

**Table S8.** Fitting parameters for SANS curve shown in Figure S5. The radius of PS<sub>s</sub>, and dimensions of HSA were fixed with the values that were obtained in single components (Table S5 and Table S7).

| Radius /<br>Å    | Radius<br>polar / Å | Radius<br>equatorial<br>/ Å | SLD <sub>n</sub><br>solvent /<br>10 <sup>-6</sup> Å <sup>-2</sup> | SLD <sub>n</sub> PS<br>/ 10 <sup>-6</sup> Å <sup>-2</sup> | SLD <sub>n</sub> HSA / 10 <sup>-6</sup> Å <sup>-2</sup> |
|------------------|---------------------|-----------------------------|-------------------------------------------------------------------|-----------------------------------------------------------|---------------------------------------------------------|
| 135 <sup>a</sup> | 15.6                | 43.7                        | 6.35                                                              | 1.34                                                      | 2.40                                                    |

<sup>a</sup> The optimised polydispersity was 17%

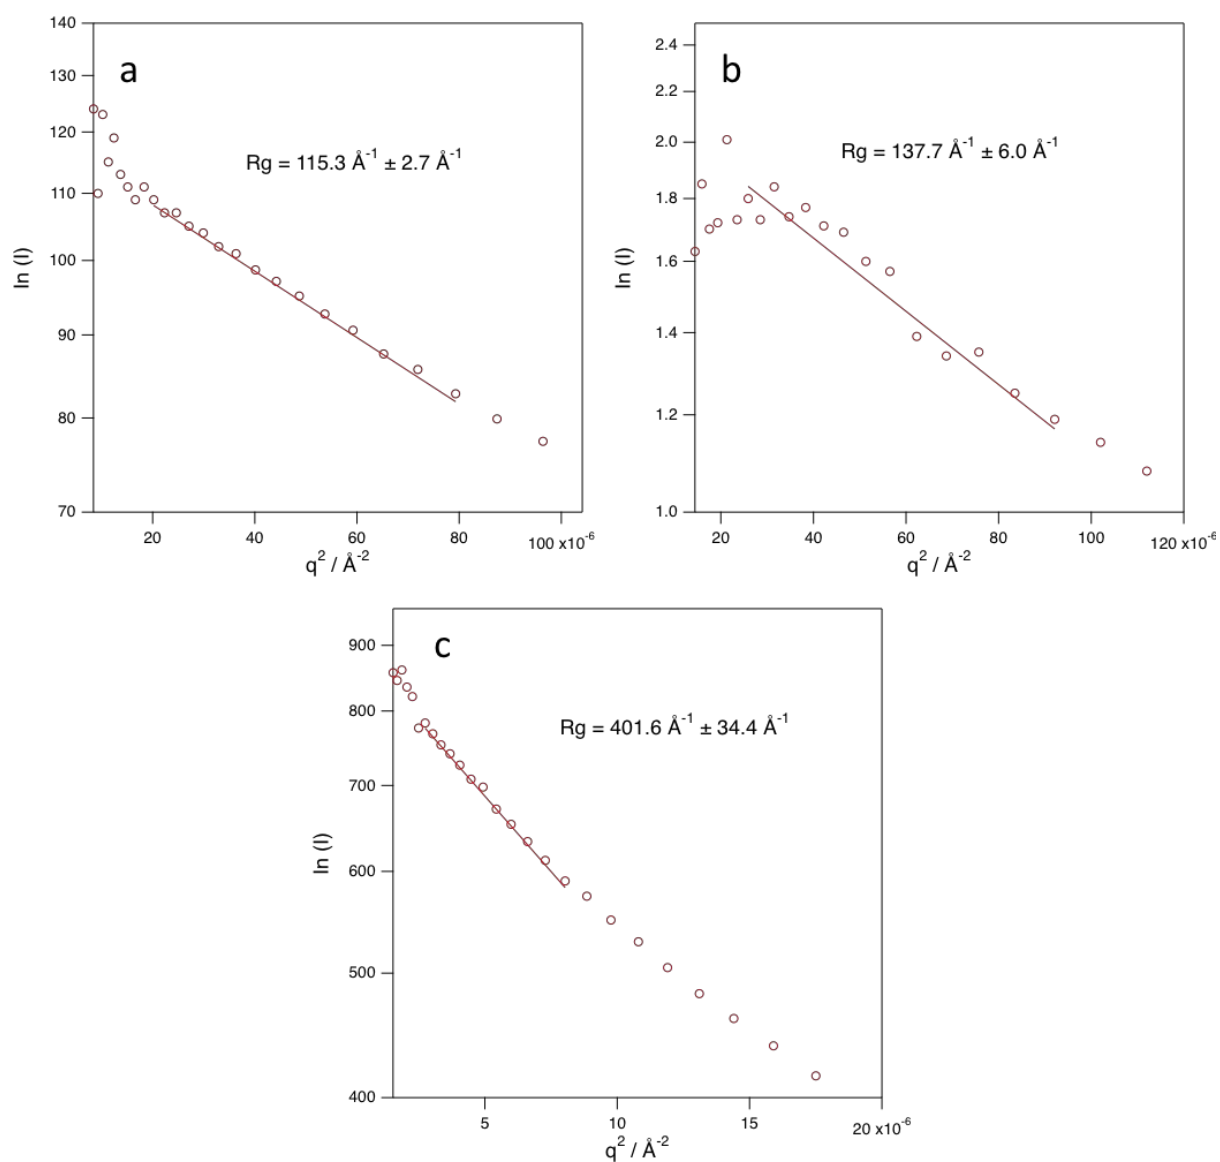

**Figure S6.** Guinier plots for (a) PS<sub>s</sub> (9.0 mg mL<sup>-1</sup>) in 100% d-buffer, (b) PS<sub>s</sub>(9.0 mg mL<sup>-1</sup>)/HSA (3.0 mg mL<sup>-1</sup>) complex in 25% d-buffer, and (c) PS<sub>s</sub>(9.0 mg mL<sup>-1</sup>)/HSA (3.0 mg mL<sup>-1</sup>) complex in 100% d-buffer.



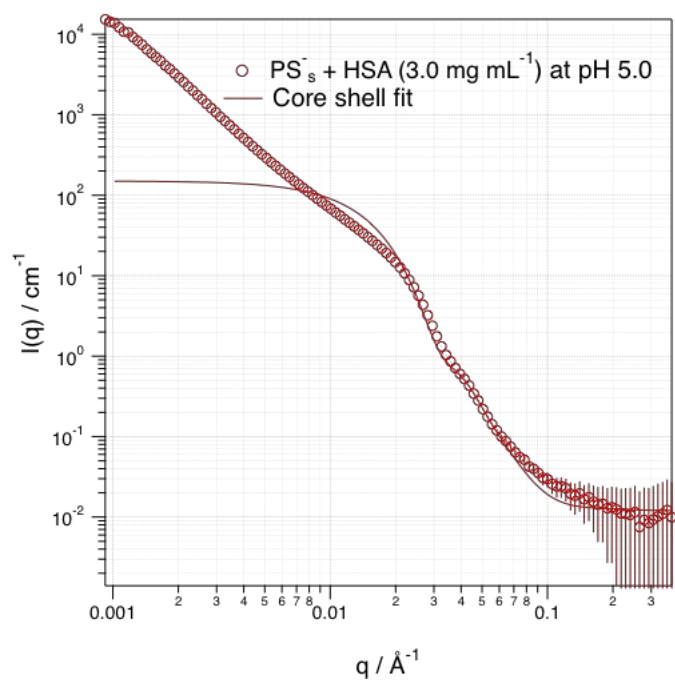

**Figure S7.** SANS curve for PS-s/HSA complex in 100% d-buffer (pH 5.0), fitted with core shell model.

**Table S9.** Fitting parameters for Figure S7

| Radius /<br>Å    | Thickness<br>/ Å | SLD <sub>n</sub><br>solvent /<br>10 <sup>-6</sup> Å <sup>-2</sup> | SLD <sub>n</sub><br>core / 10 <sup>-6</sup> Å <sup>-2</sup> | SLD <sub>n</sub> shell / 10 <sup>-6</sup> Å <sup>-2</sup> |
|------------------|------------------|-------------------------------------------------------------------|-------------------------------------------------------------|-----------------------------------------------------------|
| 135 <sup>a</sup> | 15.6 ±<br>1.90   | 6.35                                                              | 1.34                                                        | 2.40                                                      |

**Table S10.** Fitting parameters for Figure 9, PS<sub>L</sub>/HSA complex at pH 7.4.

| Radius<br>/ Å                                    | Radius<br>polar /<br>Å | Radius<br>equatorial<br>/ Å | SLD <sub>n</sub> solvent<br>/ 10 <sup>-6</sup> Å <sup>-2</sup> | SLD <sub>n</sub> PS / 10 <sup>-6</sup><br>Å <sup>-2</sup> | SLD <sub>n</sub> HSA / 10 <sup>-6</sup><br>Å <sup>-2</sup> |
|--------------------------------------------------|------------------------|-----------------------------|----------------------------------------------------------------|-----------------------------------------------------------|------------------------------------------------------------|
| 1187 <sup>a</sup>                                | 15.6                   | 43.7                        | 6.35                                                           | 1.34                                                      | 2.40                                                       |
| The optimised polydispersity was fitted to be 2% |                        |                             |                                                                |                                                           |                                                            |

**Table S11.** Fitting parameters for Figure 9, PS<sub>L</sub>/HSA complex at pH 5.0.

| Radius<br>/ Å                                    | Radius<br>polar /<br>Å | Radius<br>equatorial<br>/ Å | SLD <sub>n</sub><br>solvent<br>/ 10 <sup>-6</sup> Å <sup>-2</sup> | SLD <sub>n</sub><br>PS /<br>10 <sup>-6</sup> Å <sup>-2</sup> | SLD <sub>n</sub><br>HSA / 10 <sup>-6</sup><br>Å <sup>-2</sup> | Perturb             | Stickiness         |
|--------------------------------------------------|------------------------|-----------------------------|-------------------------------------------------------------------|--------------------------------------------------------------|---------------------------------------------------------------|---------------------|--------------------|
| 1187 <sup>a</sup>                                | 15.6                   | 43.7                        | 6.35                                                              | 1.34                                                         | 2.40                                                          | 0.0620 ±<br>0.00085 | 0.140 ±<br>0.00015 |
| The optimised polydispersity was fitted to be 2% |                        |                             |                                                                   |                                                              |                                                               |                     |                    |

## Representation of fractal dimension in colloidal system

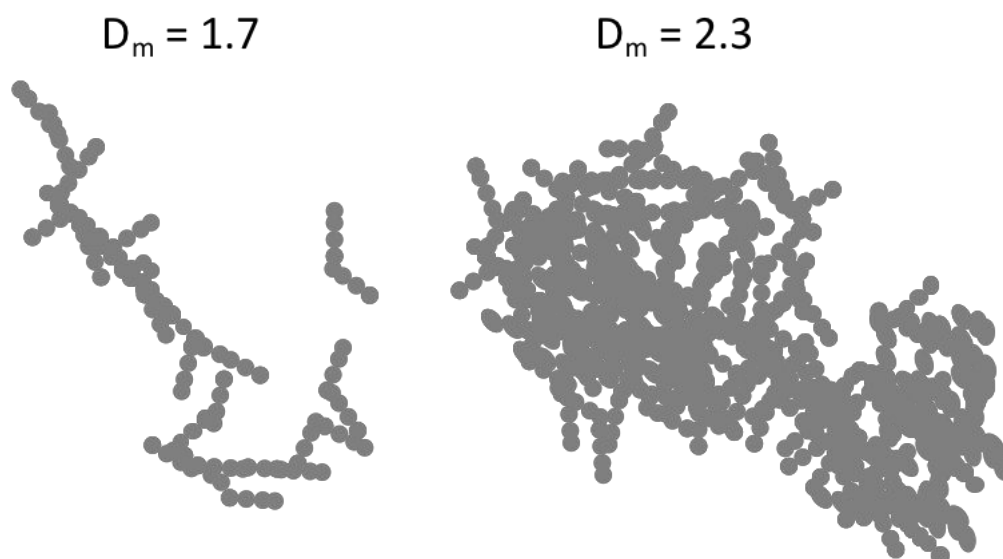

**Figure S8.** Graphical representation of fractals with different fractal dimensions.

## Theoretical calculation of HSA net charge

The net charge of human serum albumin (HSA) was calculated with the following equation:

$$\text{net charge (positive charge)} = \frac{10^{-pK_a}}{10^{-pK_a} + 10^{-pH}} \quad \text{Equation S1}$$

$$\text{net charge (negative charge)} = \frac{10^{-pH}}{10^{-pH} + 10^{-pK_a}} \quad \text{Equation S2}$$

The number and the pKa values of each amino acid used in the calculation is found in Table S11.

**Table S12.** Relevant properties of HSA for calculating net charges at various pH.

| Amino acid    | pKa of side group <sup>2</sup> | Number <sup>3</sup> |
|---------------|--------------------------------|---------------------|
| Arginine      | 12.8                           | 24                  |
| Histidine     | 6.0                            | 16                  |
| Lysine        | 10.1                           | 59                  |
| Aspartic acid | 3.7                            | 36                  |
| Glutamic acid | 4.3                            | 62                  |
| Cysteine*     | 8.2                            | 1                   |

\*One cysteine that does not form disulfide bridge is used in this calculation.<sup>3</sup>

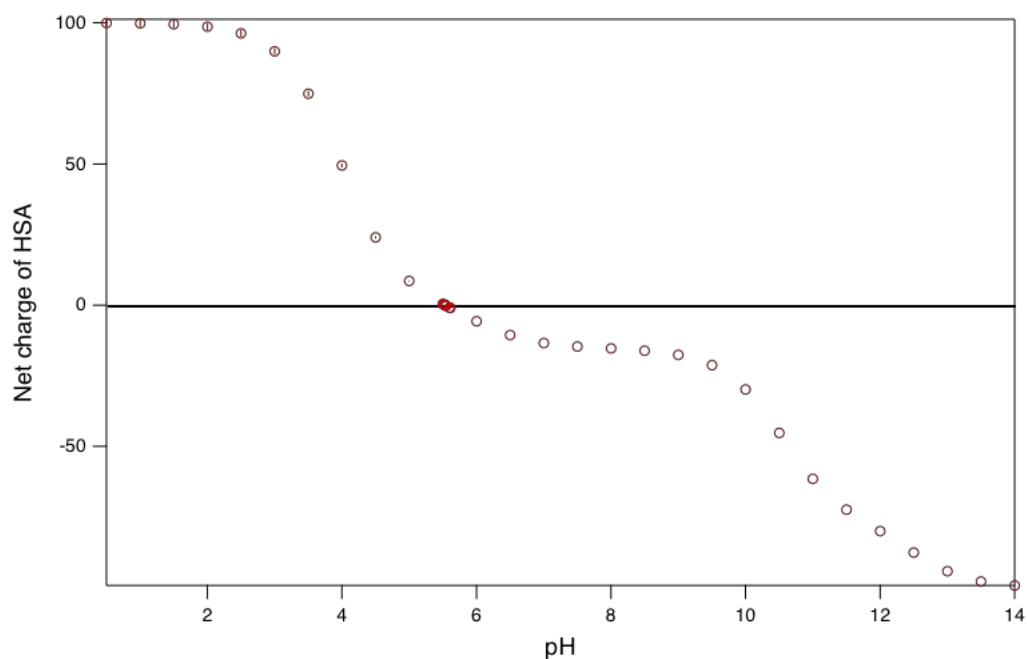

**Figure S9.** Theoretically calculated net charge of HSA as a function of pH.

## References

1. Berts, I.; Fragneto, G.; Porcar, L.; Hellsing, M. S.; Rennie, A. R., Controlling adsorption of albumin with hyaluronan on silica surfaces and sulfonated latex particles. *J. Colloid Interface Sci.* **2017**, *504*, 315-324.
2. Lide, D., DR 1991-1992. *Handbook of chemistry and physics. 72nd edition*, CRC Press, Boca Raton, FL, 17.
3. Sugio, S.; Kashima, A.; Mochizuki, S.; Noda, M.; Kobayashi, K., Crystal structure of human serum albumin at 2.5 Å resolution. *Protein Eng.* **1999**, *12* (6), 439-446.
